# Supplementary material for: Study on the clinical features and prognosis of second and third generations of COVID-19
Source: PubMed Central journal article supplement — Ann Transl Med. 2022 Jun;10(12):697. doi: 10.21037/atm-22-1819 (PMC9279802; doi:10.21037/atm-22-1819), 2022-06
Supplement: atm-10-12-697-dss.pdf [file atm-10-12-697-dss.pdf]

## Data Sharing Statement

|                     |                                                                                                                                                     |                                                                                 |
|---------------------|-----------------------------------------------------------------------------------------------------------------------------------------------------|---------------------------------------------------------------------------------|
| <b>Article Info</b> | <a href="https://dx.doi.org/10.21037/atm-22-1819">https://dx.doi.org/10.21037/atm-22-1819</a>                                                       |                                                                                 |
| <b>Item</b>         | <b>Question</b>                                                                                                                                     | <b>Authors' Response<br/>(place "-" if not applicable)</b>                      |
| 1                   | Would you like to share data collected for your study to others?                                                                                    | No.                                                                             |
| 2                   | If not, would you like to share the reason for your decision?                                                                                       | Because the data involved patients' privacy and should not be widely disclosed. |
| 3                   | What data in particular will be shared?                                                                                                             | -                                                                               |
| 4                   | Any other documents will be shared? Such as study protocol, statistical analysis plan, informed consent form, clinical study report, analytic code. | -                                                                               |
| 5                   | When will data availability begin?                                                                                                                  | -                                                                               |
| 6                   | When will data availability end?                                                                                                                    | -                                                                               |
| 7                   | To whom will you share the data?                                                                                                                    | -                                                                               |
| 8                   | For what type of analysis or purpose?                                                                                                               | -                                                                               |
| 9                   | How or where can the data/documents be obtained?                                                                                                    | -                                                                               |
| 10                  | Any other restrictions?                                                                                                                             | -                                                                               |
